# Supplementary material for: Impact of predictor measurement heterogeneity across settings on the performance of prediction models: A measurement error perspective
Source: PubMed Central journal article supplement (PMC6619392; doi:10.1002/sim.8183), 2019-05-31
Supplement: SIM-38-3444-s003.pdf [file SIM-38-3444-s003.pdf]

## Random measurement heterogeneity

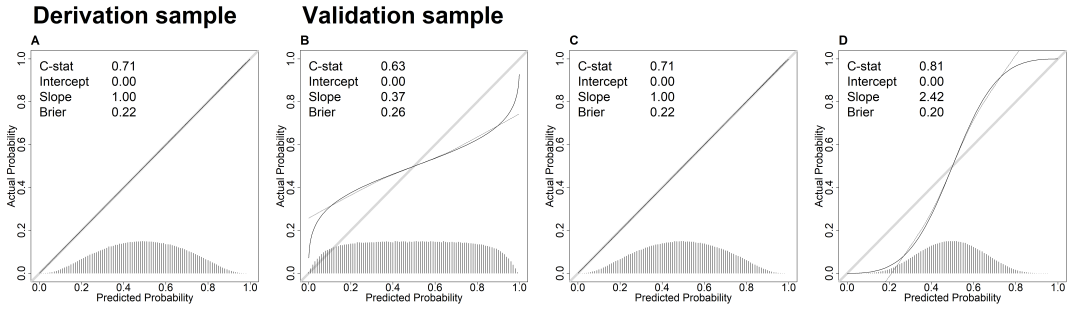

**FIGURE 5** Predictive performance of a single-predictor binary logistic regression model. The predictor measurement structure corresponds to:

A.  $W_D = X + \epsilon_D$ , where  $X \sim \mathcal{N}(0, 0.5)$  and  $\epsilon_D \sim \mathcal{N}(0, 0.5)$ .

B.  $W_V = X + \epsilon_V$ , where  $X \sim \mathcal{N}(0, 0.5)$  and  $\epsilon_V \sim \mathcal{N}(0, 2.0)$ .

C.  $W_V = X + \epsilon_V$ , where  $X \sim \mathcal{N}(0, 0.5)$  and  $\epsilon_V \sim \mathcal{N}(0, 0.5)$ .

D.  $W_V = X$ , where  $X \sim \mathcal{N}(0, 0.5)$ .

Measurements are less precise at validation, i.e.  $\sigma_{\epsilon(D)}^2 < \sigma_{\epsilon(V)}^2$ .

Measurements consistent across settings, i.e.  $\sigma_{\epsilon(D)}^2 = \sigma_{\epsilon(V)}^2$ .

Measurements are more precise at validation, i.e.  $\sigma_{\epsilon(D)}^2 > \sigma_{\epsilon(V)}^2$ .
