# Supplementary material for: Impact of predictor measurement heterogeneity across settings on the performance of prediction models: A measurement error perspective
Source: PubMed Central journal article supplement (PMC6619392; doi:10.1002/sim.8183), 2019-05-31
Supplement: SIM-38-3444-s004.pdf [file SIM-38-3444-s004.pdf]

## Additive systematic measurement heterogeneity

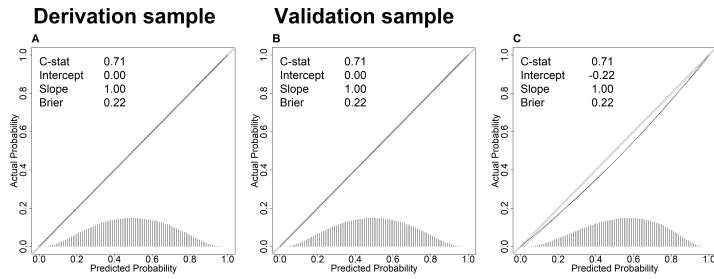

**FIGURE 6** Predictive performance of a single-predictor binary logistic regression model. The degree of additive error in the validation predictor measurement  $W_V$  varies, while the degree of random error is consistent across settings, i.e. while  $\sigma_{\epsilon(D)}^2 = \sigma_{\epsilon(V)}^2$ . The predictor measurement structure corresponds to:

- A.  $W_D = X + \epsilon_D$ ,      where  $X \sim \mathcal{N}(0, 0.5)$  and  $\epsilon_D \sim \mathcal{N}(0, 0.5)$ .
- B.  $W_V = \psi_V + X + \epsilon_V$ ,      where  $\psi_V = 0$ ,  $X \sim \mathcal{N}(0, 0.5)$  and  $\epsilon_V \sim \mathcal{N}(0, 0.5)$ .      Measurements are equal across settings.
- C.  $W_V = \psi_V + X + \epsilon_V$ ,      where  $\psi_V = 0.25$ ,  $X \sim \mathcal{N}(0, 0.5)$  and  $\epsilon_V \sim \mathcal{N}(0, 0.5)$ .      Measurements are shifted from  $X$  by a constant.
